# Supplementary material for: Evaluation of the Cytotoxicity and Genotoxicity of Flavonolignans in Different Cellular Models
Source: PubMed Central journal article supplement (PMC5748806; doi:10.3390/nu9121356), 2017-12-14
Supplement: nutrients-09-01356-s001.pdf [file nutrients-09-01356-s001.pdf]

**Table S1.** Description of semi-long run RT-PCR primers used for mitochondrial and nuclear DNA damage quantification. All primers were designed with the help of the Primer3 software (<http://bioinfo.ut.ee/primer3-0.4.0/>) and synthesized by Sigma-Aldrich (St. Louis, Missouri, USA). Complete nucleotide sequences for each gene were taken from the ENSEMBL database (<https://ensembl.org/>).

| Genome                                                        | Target gene                                                                                     | Forward primer sequences<br>(5'→3')     | Reverse primer sequence (5'→3')                | Amplicon<br>length<br>(bp)             |      |
|---------------------------------------------------------------|-------------------------------------------------------------------------------------------------|-----------------------------------------|------------------------------------------------|----------------------------------------|------|
| Mitochondrial                                                 | <i>ND1</i> (mitochondrially<br>encoded NADH:<br>ubiquinone<br>oxidoreductase core<br>subunit 1) | Long fragment:<br>ATGGCCAACCTCCTACTCCT  | Long fragment:<br>GATGAGTGTGCCTGCAAAGA         | 1214                                   |      |
|                                                               |                                                                                                 | Small fragment:<br>CCTAAAACCCGCCACATCTA | Small fragment:<br>GCCTAGGTTGAGGTTGACCA        | 124                                    |      |
|                                                               | <i>ND5</i> (mitochondrially<br>encoded NADH:<br>ubiquinone<br>oxidoreductase core<br>subunit 5) | Long fragment:<br>TCCAATCATGAGACCCACA   | Long fragment:<br>AGGTGATGATGGAGGTGGAG         | 1156                                   |      |
|                                                               |                                                                                                 | Small fragment:<br>AGGCGCTATCACCCTCTGT  | Small fragment:<br>TTGGTTGATGCCGATTGTAA        | 124                                    |      |
|                                                               | Nuclear                                                                                         | <i>TP53</i> (tumour protein<br>p53)     | Long fragment:<br>GGGTGTAGATGATGGGGATG         | Long fragment:<br>AACTGCGGAATGAAACAACC | 1172 |
|                                                               |                                                                                                 |                                         | Small fragment:<br>AAGCTGCTAAGGTCCACAA         | Small fragment:<br>GGAAAGATCGCTCCAGGAA | 56   |
| <i>HPRT1</i> (hypoxanthine<br>phosphoribosyltransferase<br>1) |                                                                                                 | Long fragment:<br>AGGGCAAAGGATGTGTTACG  | Long fragment:<br>AGTGGTTTCTGGTGCGACTT         | 1018                                   |      |
|                                                               |                                                                                                 | Small fragment:<br>TGCTGACCTGCTGGATTACA | Small fragment:<br>TCTACAGTCATAGGAATGGATCTATCA | 69                                     |      |

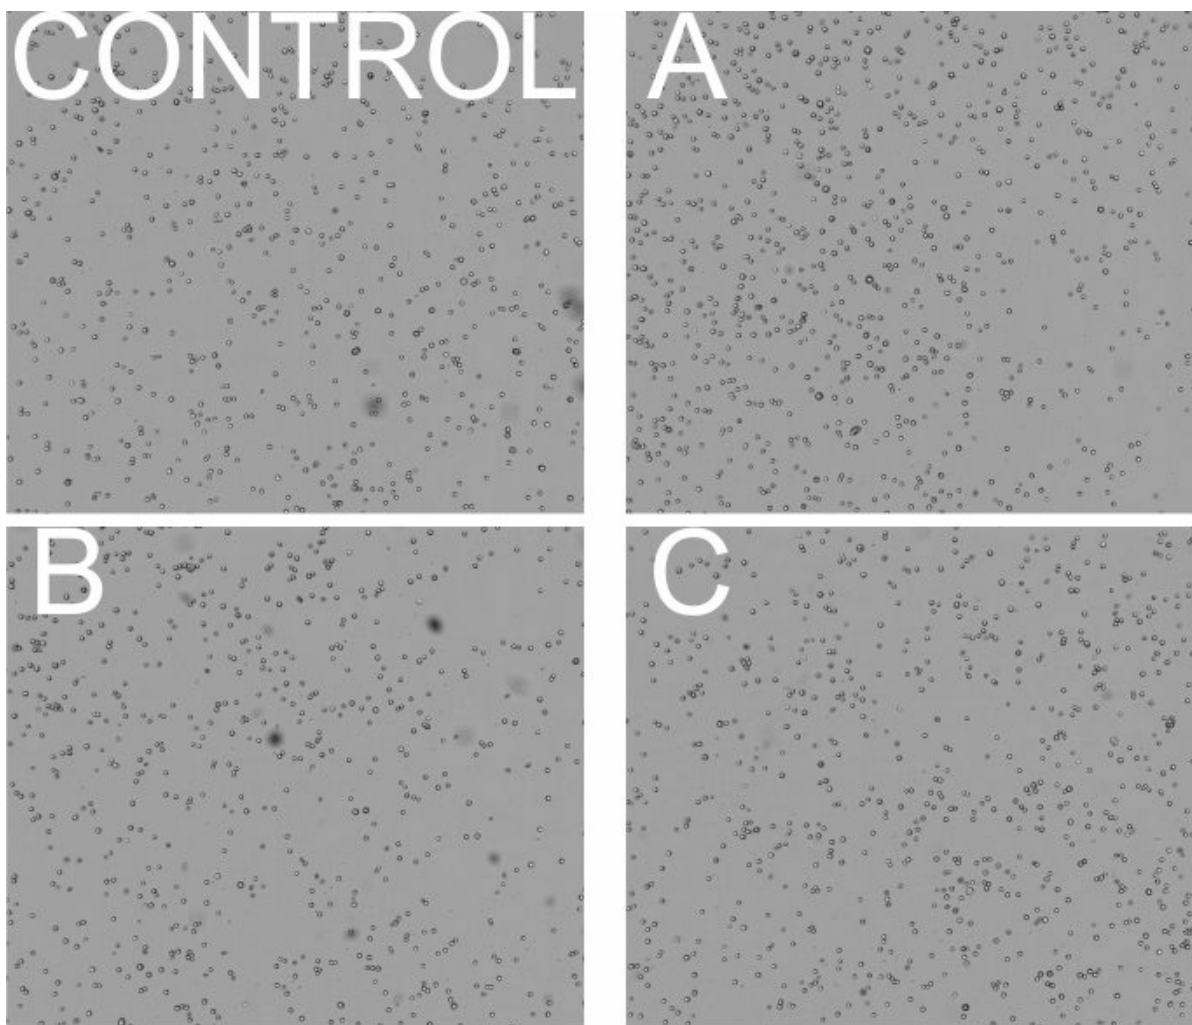

**Figure S1.** The absence of morphological changes in the A549 cells cultures in the presence of flavonolignans ((A) silychristin, (B) silybin, (C) silydianin) in a concentration of 100  $\mu\text{M}$ . The figure here presents samples of photos obtained during the viability analysis in the cell counter.
